# Supplementary material
Source: HighWire-hosted journal article supplement (doi:10.1101/rna.043745.113)

# Supplemental Figure 2

## A MiR-135b Inhibitor Transfection

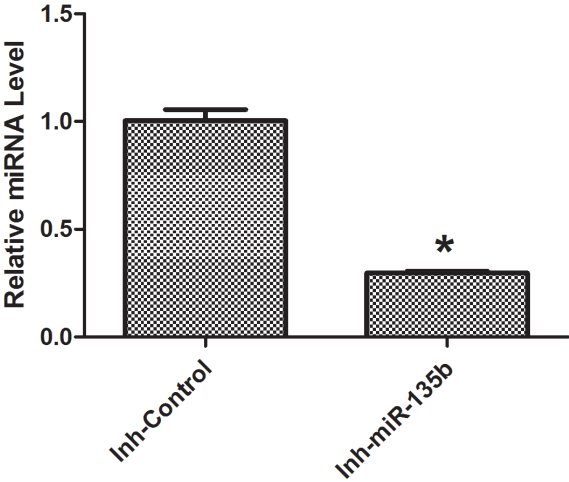

## MiR-135b mimic Transfection

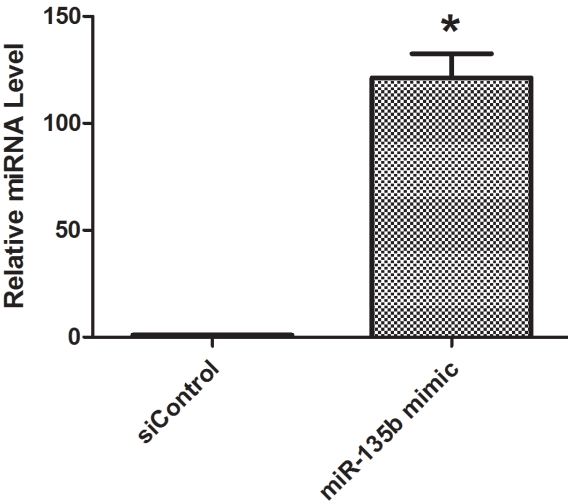

## B

AFP

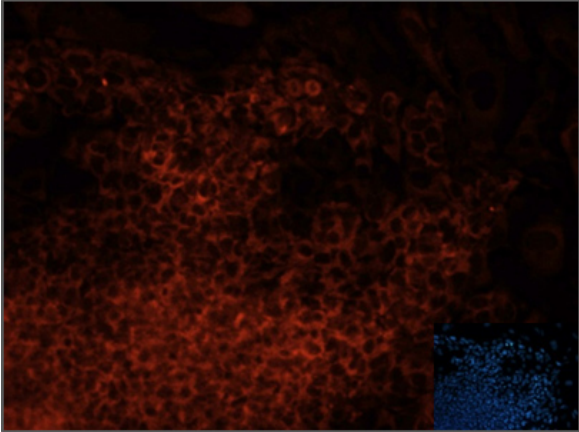

Tubulin III

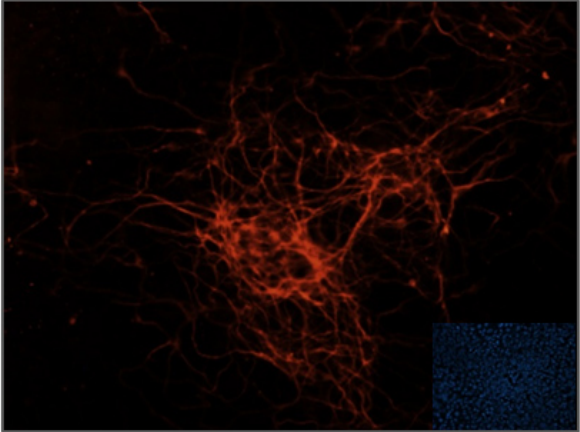

$\alpha$ -Actinin

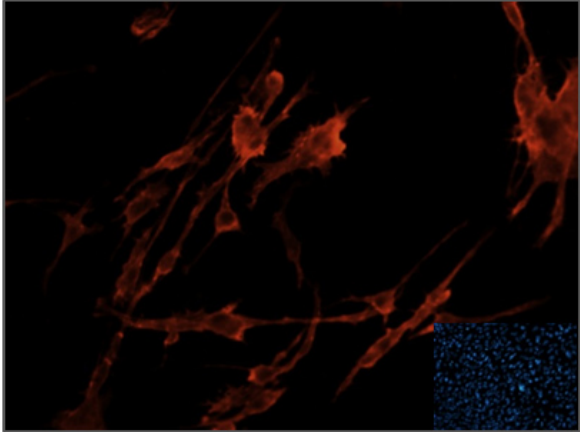

Supplement: miR-135b_Sup_Fig2.pdf [file miR-135b_Sup_Fig2.pdf]
