# Supplementary material
Source: HighWire-hosted journal article supplement (doi:10.1101/rna.043745.113)

# Supplemental Figure 3

## A

| Gene Names | # of Predicted Sites (miRanda/TargetScan) | Representative Sites                                                                                                                | Predicted Energy |
|------------|-------------------------------------------|-------------------------------------------------------------------------------------------------------------------------------------|------------------|
| Tgfbr2     | 0/1                                       | miR-135b: 3' AGUGUAUCCUACUUUUCGGUAU 5'<br>: :                    <br>Ref: 5' AUAUCUCUCUAUAUAUAGCCAUA 3'                             | N/A              |
| Wisp1      | 3/1                                       | miR-135b: 3' AGUGUAUCCUA-C-U-UUUCGGUAU 5'<br>   :   :                   <br>Ref: 5' TCCCGTAGGGATGGGACAAGGCCA-G 3'                   | -24.7kcal/mol    |
| Igfbp5     | 1/0                                       | miR-135b: 3' A-GU-GUA-UC-CUACUU-UUCGGUAU 5'<br>                    :                    <br>Ref: 5' TACAGCTTAAGAGAG-GAGTGAGCCA-A 3' | -16.8kcal/mol    |

## B

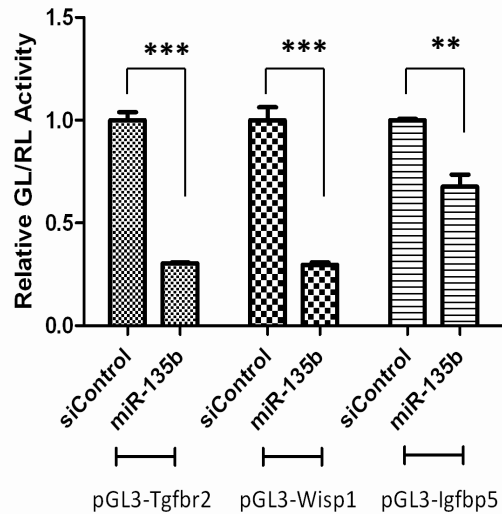

## C

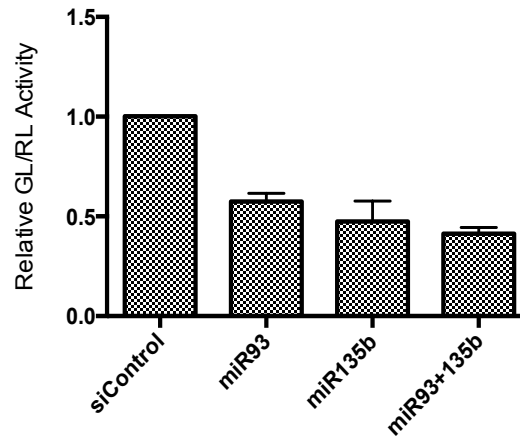

## D

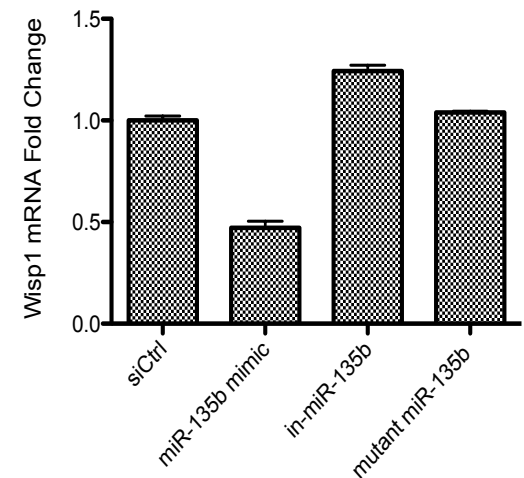

Supplement: miR-135b_Sup_Fig3.pdf [file miR-135b_Sup_Fig3.pdf]
