# Supplementary material
Source: HighWire-hosted journal article supplement (doi:10.1101/rna.043745.113)
Supplement: Supp_Table_1.pdf [file Supp_Table_1.pdf]

| Gene Names        | No. Of Predicted Sites | Fold Change | Representative Sites                                                                                                    | Predicted Energy |
|-------------------|------------------------|-------------|-------------------------------------------------------------------------------------------------------------------------|------------------|
| Mmp13             | 2/0                    | -4.53       | miR-135b: 3' AG-U-GU-A-UCC-UUACUUUC-GGUAU 5'<br> :  :                       <br>Ref: 5' TTAATATTTAGGCATTGAAAAGACCATA 3' | -20.3kcal/mol    |
| Gpc1              | 1/1                    | -3.21       | miR-135b: 3' AGUGUAUCCUUA-CUUUUCGGU-AU 5'<br>         :             <br>Ref: 5' TCAC-T-GGGTTAGAGAGGCTATTG 3'            | -20.8kcal/mol    |
| Mmp10             | 0/0                    | -3.20       | N/A                                                                                                                     | N/A              |
| Ece1              | 1/1                    | -2.99       | miR-135b: 3' AGUGUAUCCUUA-C-U-UUUCGGUAU 5'<br>       :                    <br>Ref: 5' TC-CA-GGGAATGCCAGAAAGTCATC 3'     | -18.79kcal/mol   |
| 1190002<br>H23Rik | 1/na                   | -2.76       | miR-135b: 3' AGUGUAUCCUUA-ACUUUUCGGUAU 5'<br> :  :      :               <br>Ref: 5' TTATATA-TAGTTG-GAGGTCATA 3'         | -16.7kcal/mol    |
| Rgs16             | 2/2                    | -2.74       | miR-135b: 3' AGU-GUA-UCCUACUUUUCGGU-A-U 5'<br>             :              <br>Ref: 5' TGAGC-TAAGGA-GAGAAGTCATTGA 3'     | -19.2kcal/mol    |
| Entpd4            | 1/1                    | -2.71       | miR-135b: 3' AGUGUAUCCU-UACUU--UUCGGUA-U 5'<br>       :                     <br>Ref: 5' TC-C-TGGGACA-GAACCAAGCCGTGA 3'  | -17.2kcal/mol    |
| Sema7a            | 0/0                    | -2.63       | N/A                                                                                                                     | N/A              |
| Inhba             | 0/1                    | -2.60       | miR-135b: 3' AGUGUAUCCUUAUUUUCGGUAU 5'<br>:                 :<br>Ref: 5' AUAUAAUGUCUAGAAAGCCAUG 3'                      | N/A              |
| Adra2a            | 0/1                    | -2.56       | miR-135b: 3' AGUGUAUCCUUAUUUUCGGUAU 5'<br>        :               <br>Ref: 5' UCAGCCCCGUGUAUAAAGCCAUU 3'                | N/A              |
| Creld1            | 0/0                    | -2.56       | N/A                                                                                                                     | N/A              |
| Spr2k             | 0/na                   | -2.47       | N/A                                                                                                                     | N/A              |
| Cxcl14            | 0/0                    | -2.41       | N/A                                                                                                                     | N/A              |
| Tgfb2             | 0/1                    | -2.37       | miR-135b: 3' AGUGUAUCCUUAUUUUCGGUAU 5'<br>: :                  <br>Ref: 5' AUAUCUCUCUAUAUAGCCAUA 3'                     | N/A              |
| Wisp1             | 3/1                    | -2.36       | miR-135b: 3' AGUGUAUCCUUA-C-U-UUUCGGUAU 5'<br>    :                     <br>Ref: 5' TCCCGTAGGGATGGGACAAGCCA-G 3'        | -24.7kcal/mol    |

|                   |        |       |                                                                                                                        |               |
|-------------------|--------|-------|------------------------------------------------------------------------------------------------------------------------|---------------|
| Ccl12             | 0/na   | -2.33 | N/A                                                                                                                    | N/A           |
| 2310001<br>A20Rik | 1/na   | -2.31 | miR-135b: 3' AGUGUAUCCUUA-CUU-UUCGGUAU 5'<br>                   <br>Ref: 5' TCACATAGGTCTGGAAGGAGCCATG 3'               | -28.6kcal/mol |
| Ogfr              | 0/0    | -2.25 | N/A                                                                                                                    | N/A           |
| Aqp5              | 1/na   | -2.23 | miR-135b: 3' AGUGUAUCCUAC-UUUUC-GGUA-U 5'<br>  :      :               <br>Ref: 5' TGGGAT-GGGA-GCAGAAGCCCATGA 3'        | -18.7kcal/mol |
| Dusp4             | 0/0    | -2.13 | N/A                                                                                                                    | N/A           |
| Grem1             | 0/0    | -2.13 | N/A                                                                                                                    | N/A           |
| Trib3             | 0/0    | -2.08 | N/A                                                                                                                    | N/A           |
| Ifit3             | 0/0    | -2.05 | N/A                                                                                                                    | N/A           |
| St3gal3           | 1/0    | -2.06 | miR-135b: 3' A-G-UGUAUCCUU-ACUUUUCGGUAU 5'<br>        :      :   <br>Ref: 5' TCCACAGGGGAACCCAGAGCCATC 3'               | -20.3kcal/mol |
| Mthfd2            | 0/0    | -2.01 | N/A                                                                                                                    | N/A           |
| Igfbp5            | 1/0/1* | -2.01 | miR-135b: 3' A-GU-GUA-UC-CUUACUU-UUCGGUAU 5'<br>              :            <br>Ref: 5' TACAGCTTAAGAGAG-GAGTGAGCCA-A 3' | -16.8kcal/mol |
| Nbl1              | 0/0    | -2.00 | N/A                                                                                                                    | N/A           |

Target sites are shown as “miRanda predicted/ Targetscan predicted”. \* RNAhybrid identified another seed-match site (Kruger and Rehmsmeier 2006)

#### References:

Kruger J, Rehmsmeier M. 2006. RNAhybrid: microRNA target prediction easy, fast and flexible. *Nucleic Acids Res* **34**: W451-454.
