# Supplementary material
Source: HighWire-hosted journal article supplement (doi:10.1101/rna.043745.113)
Supplement: Supp_Table_2.xlsx [file Supp_Table_2.xlsx]

## Sheet: Sheet1
Probe ID	microRNAs	MEFs (Ctrl)	Thy1+ Cells Day5	Thy1- Cells Day5	CHROMOSOME	Fold Change (Thy1-/Ctrl)	Raw p-value	Adjusted p-value (Benjamini & Hochberg)
ILMN_3166979	mmu-miR-223	23609.8	11127.7	5009.21	X	-4.71329	0	0
ILMN_3167887	mmu-miR-543	2198.5	1020.58	467	12	-4.70771	1.07364e-05	4.47153e-05
ILMN_3167409	mmu-miR-542-5p	186.458	177.125	45.9583	X	-4.05712	0	0
ILMN_3167846	mmu-miR-665	2968.25	3031.46	756.542	12	-3.92345	0	0
ILMN_3168509	mmu-miR-142-5p	9271.25	5771.12	2394.12	11	-3.8725	0	0
ILMN_3167397	mmu-miR-450b-5p	1008.08	618.417	291.583	X	-3.45727	0.00427337	0.0122697
ILMN_3167698	mmu-miR-184	332	295.5	104.75	9	-3.16945	0.0377809	0.0842292
ILMN_3167215	mmu-miR-370	1054.29	709.229	341.583	12	-3.08648	4.79372e-11	3.07936e-10
ILMN_3167383	mmu-miR-431	3672.5	3614.62	1195.17	12	-3.07279	1.0026e-06	4.45339e-06
ILMN_3167419	mmu-miR-376a*	10785	11485.3	4213.46	12	-2.55965	0	0
ILMN_3167052	mmu-miR-495	9908.29	7695.71	4398.33	12	-2.25274	0	0
ILMN_3167553	mmu-miR-491	1670.42	1320.96	3398.25	4	2.03437	7.29085e-05	0.000283138
ILMN_3168517	mmu-miR-93	10821.1	18965.5	22198	5	2.05137	0	0
ILMN_3166986	mmu-miR-92a	5989.58	6450.38	12607.8	14,X	2.10495	0.000170223	0.000614425
ILMN_3167510	mmu-miR-20a	17315.9	33186.3	36422.1	14	2.10339	0	0
ILMN_3167938	mmu-miR-302d	94.625	197.792	236.042	3	2.4945	0	0
ILMN_3167918	mmu-miR-701	5277.92	7928.62	14486.3	5	2.74471	6.43929e-15	5.42332e-14
ILMN_3168117	mmu-miR-547	166.479	1955.67	743.75	X	4.46753	0	0
ILMN_3168303	mmu-miR-124	696.333	6182.83	5252	2,14,3	7.54237	8.11459e-08	4.04662e-07
ILMN_3167279	mmu-miR-302b	222.917	757.625	3749.17	3	16.8187	0	0
ILMN_3167874	mmu-miR-135b	446.208	8373.08	13559.2	1	30.3877	0	0
