# Supplementary material
Source: HighWire-hosted journal article supplement (doi:10.1101/rna.043745.113)
Supplement: Supp_Table_3.xlsx [file Supp_Table_3.xlsx]

## Sheet: Original
	siControl	miR-135b	miR-135b/siControl	Fold Change(135b/Ctrl)	raw p-value	Adjusted p-value (Benjamini & Hochberg)
Mmp13	2439.72	538.708	0.220808	-4.52883	0.57958	0.741349
Ssr2	9958.9	2575.13	0.258576	-3.86733	0	0
Gpc1	17654.3	5494.53	0.31123	-3.21306	0	0
Mmp10	898.45	280.846	0.312589	-3.19909	0	0
Ece1	3008.7	1005.79	0.334294	-2.99138	0	0
1190002H23Rik	885.383	321.308	0.362903	-2.75556	0	0
Rgs16	7778.23	2841.02	0.365253	-2.73783	0	0
Entpd4	4623.37	1703.73	0.368505	-2.71367	0	0
Sema7a	980.567	373.225	0.380622	-2.62728	0	0
Inhba	12432.4	4787.7	0.3851	-2.59673	0	0
Adra2a	1711	668.883	0.390931	-2.55799	0	0
Creld1	2141.55	837.163	0.390914	-2.55811	0	0
Eif4ebp1	14258.2	5669.41	0.397625	-2.51493	0	0
Sprr2k	6371.66	2581.3	0.405122	-2.46839	0	0
Cxcl14	5082.5	2109.08	0.41497	-2.40981	0	0
Tgfbr2	6950.12	2935.29	0.422337	-2.36778	0	0
Wisp1	11202.6	4737.12	0.422859	-2.36486	0	0
Ccl12	1894.2	812.846	0.429124	-2.33033	0	0
2310001A20Rik	1022.27	441.85	0.432222	-2.31362	0	0
Ogfr	2861.77	1272.85	0.444776	-2.24832	0	0
Aqp5	1304.99	584.117	0.447602	-2.23413	4.62429e-06	2.83762e-05
Nptx2	925.5	421.333	0.455249	-2.1966	0	0
Dusp4	1473.97	691.95	0.469447	-2.13016	3.04801e-12	3.42608e-11
Grem1	1314.44	616.475	0.469001	-2.13219	3.52385e-13	4.25951e-12
1200015F23Rik	898.875	432.258	0.480888	-2.07949	0.00034671	0.00157159
Nras	7671.45	3686.54	0.480553	-2.08093	0.656774	0.797553
Trib3	2113.99	1017.77	0.481445	-2.07708	0	0
Ifit3	2212.26	1080.08	0.488227	-2.04823	0.00227729	0.00858604
St3gal3	3312.25	1609.75	0.485999	-2.05762	0.0905704	0.197888
Mthfd2	1443.7	716.542	0.496323	-2.01482	0	0
Igfbp5	10339.2	5151.6	0.49826	-2.00698	2.22045e-16	3.23054e-15
Nbl1	4588.85	2290.64	0.499176	-2.0033	0	0
Ndufa4	25525.4	12770.3	0.500298	-1.99881	0	0
Ly6a	20063.1	40192	2.00328	2.00328	0	0
BC031353	960.237	1930.3	2.01023	2.01023	0	0
Btbd1	1216.27	2449.93	2.01431	2.01431	0	0
Kif1b	1098.59	2218.4	2.01932	2.01932	4.46158e-09	3.83898e-08
Adamts12	1180.03	2405.31	2.03835	2.03835	0	0
Tmem43	2145.79	4415.1	2.05756	2.05756	0	0
4933439C20Rik	1743.22	3600.12	2.06521	2.06521	0	0
Ncald	178.2	368.558	2.06823	2.06823	0	0
Nnmt	2737.99	5777.23	2.11002	2.11002	2.47095e-05	0.000136568
Notch3	243.071	513.575	2.11286	2.11286	0	0
Cxadr	208.138	440.571	2.11673	2.11673	0	0
Ptprv	540.675	1150.18	2.1273	2.1273	0	0
Mxd4	588.163	1261.93	2.14555	2.14555	0	0
Gabarap	7238.64	15543.5	2.1473	2.1473	0	0
Tle6	489.025	1058.23	2.16397	2.16397	0	0
Fas	751.067	1629.85	2.17005	2.17005	0	0
Ephx1	6257.48	14002	2.23764	2.23764	0	0
Ddit4l	1087.96	2482.03	2.28135	2.28135	0	0
Nipa1	718.133	1642.92	2.28777	2.28777	1.49732e-08	1.22926e-07
Ctxn	457.967	1069.15	2.33455	2.33455	0	0
Tcea3	1136.99	2677.83	2.35518	2.35518	0	0
Il7	292.792	692.871	2.36643	2.36643	0	0
Asah1	10981.8	26243.6	2.38974	2.38974	0.00653921	0.0218603
Hmox1	889.938	2178.9	2.44837	2.44837	0	0
1700007K13Rik	630.121	2569.5	4.07779	4.07779	0	0
Sncg	691.1	2831.78	4.0975	4.0975	5.61001e-10	5.2508e-09

## Sheet: Analyzed
	Genes Overlapped	Correlated	Non-correlated
Increased genes	26	11	15
Decreased genes	33	27	6
