# Supplementary material
Source: HighWire-hosted journal article supplement (doi:10.1101/rna.043745.113)
Supplement: Supp_Table_4.xlsx [file Supp_Table_4.xlsx]

## Sheet: MEFs only
Probe Set ID	Gene Accession	Gene Symbol	MEF-siControl-1	MEF-siControl-2	MEF-siWISP1_1	MEF-siWISP1_2	AVG siCtrl	AVG siWisp1	siWisp1/siCtrl	Fold Change (siWisp1/Ctrl)	Raw p-value	Adjusted p-value (Benjamini & Hochberg)
10357135	ENSMUST00000097615	2900060B14Rik	0.0044146	0.142908	1.65189	4.25005	0.0736613	2.95097	40.0613	40.0613	0.00971884	0.04136
10541605	NM_020001	Clec4n	87.1354	72.5036	514.328	657.137	79.8195	585.733	7.33821	7.33821	0	0
10451646	NM_178796	A530064D06Rik	97.6346	83.872	409.728	402.812	90.7533	406.27	4.47664	4.47664	0	0
10487588	NM_010554	Il1a	59.198	59.1154	228.321	276.612	59.1567	252.466	4.26775	4.26775	0	0
10389222	NM_009139	Ccl6	599.854	576.168	2543.92	2132.17	588.011	2338.05	3.97619	3.97619	0	0
10582592	NM_009606	Acta1	1924.71	1910.1	6591.48	6974.37	1917.41	6782.92	3.53755	3.53755	0	0
10492964	NM_009690	Cd5l	34.1476	50.8113	142.066	134.492	42.4794	138.279	3.25521	3.25521	2.23496e-09	2.90023e-08
10347888	NM_016960	Ccl20	444.78	557.394	1526.54	1556.13	501.087	1541.34	3.07599	3.07599	0	0
10415425	NM_001024714	Cma2	194.614	233.977	554.651	716.46	214.296	635.556	2.96579	2.96579	6.44418e-12	1.02749e-10
10375137	NM_031169	Kcnmb1	376.427	401.682	1048.76	1149.92	389.055	1099.34	2.82568	2.82568	0	0
10541614	NM_010819	Clec4d	483.647	543.203	1401.9	1400.98	513.425	1401.44	2.72959	2.72959	0	0
10437885	NM_013607	Myh11	296.965	262.459	738.381	772.757	279.712	755.569	2.70124	2.70124	0	0
10559467	NM_011089	Pira2	205.622	222.582	538.642	614.342	214.102	576.492	2.6926	2.6926	0	0
10403871	NM_012054	Aoah	121.563	153.494	375.935	363.327	137.528	369.631	2.68767	2.68767	0	0
10347335	NM_013612	Slc11a1	383.821	368.608	1047.52	951.292	376.215	999.404	2.65647	2.65647	0	0
10379727	NM_001081957	OTTMUSG00000000971	1235.56	1375.98	3267.53	3598.15	1305.77	3432.84	2.62898	2.62898	0	0
10499932	NM_026335	Lce1h	388.462	490.079	1126.3	1156.01	439.27	1141.15	2.59784	2.59784	2.22045e-16	4.60083e-15
10543239	NM_031198	Tcfec	365.926	354.348	840.411	1001.15	360.137	920.779	2.55675	2.55675	0	0
10544273	NM_001038604	Clec5a	129.108	121.686	285.297	344.544	125.397	314.921	2.51139	2.51139	0	0
10493886	NM_011477	Sprr2k	270.489	271.603	693.813	662.226	271.046	678.02	2.50149	2.50149	0	0
10389214	NM_011338	Ccl9	1399.83	1613.8	3525.67	3823.24	1506.82	3674.45	2.43855	2.43855	0	0
10567580	NM_030691	Igsf6	480.877	472.088	1119.2	1198.94	476.483	1159.07	2.43256	2.43256	0	0
10446965	NM_207246	Rasgrp3	429.659	480.708	1066.11	1131.51	455.184	1098.81	2.41399	2.41399	0	0
10531415	NM_021274	Cxcl10	453.03	631.549	1218.22	1380.99	542.289	1299.61	2.39652	2.39652	6.0716e-07	6.03865e-06
10559454	NM_011089	Pira2	345.276	357.851	787.102	879.815	351.563	833.458	2.37072	2.37072	0	0
10376765	NM_007436	Aldh3a1	3.23513	35.6182	50.8721	39.7992	19.4266	45.3356	2.33368	2.33368	0.234573	0.465948
10527638	NM_009663	Alox5ap	654.09	609.597	1382.61	1538.23	631.843	1460.42	2.31136	2.31136	0	0
10420254	NM_008572	Mcpt8	538.149	582.768	1206.31	1339.94	560.458	1273.12	2.27157	2.27157	0	0
10548552	NM_008462	Klra2	56.4005	41.4278	94.6258	123.338	48.9141	108.982	2.22803	2.22803	7.66246e-05	0.000552182
10420241	NM_010782	Mcpt9	165.636	199.688	327.254	480.01	182.662	403.632	2.20972	2.20972	0.000257129	0.00166601
10531420	NM_019494	Cxcl11	132.152	137.726	300.68	294.849	134.939	297.764	2.20666	2.20666	0	0
10345065	NM_001077353	Gsta3	185.167	176.529	378.905	410.45	180.848	394.678	2.18237	2.18237	0	0
10547664	NM_019948	Clec4e	98.0354	112.703	240.639	216.187	105.369	228.413	2.16774	2.16774	0	0
10368556	NM_013904	Hey2	113.158	121.104	230.442	276.777	117.131	253.609	2.16518	2.16518	3.55271e-15	6.9598e-14
10564211	NM_013670	Snrpn	552.975	519.146	1139.83	1179.95	536.061	1159.89	2.16372	2.16372	0	0
10534927	NM_153510	Pilra	167.899	200.306	379.268	410.337	184.103	394.803	2.14447	2.14447	2.22045e-15	4.40816e-14
10448124	NM_013521	Fpr1	108.047	113.68	232.758	241.495	110.864	237.127	2.13891	2.13891	0	0
10510260	NM_008726	Nppb	175.325	199.09	383.588	410.834	187.207	397.211	2.12177	2.12177	0	0
10572897	NM_010442	Hmox1	3046.28	2955.96	6259.6	6428.23	3001.12	6343.91	2.11385	2.11385	0	0
10493850	NM_011468 // NM_011468	Sprr2a // Sprr2a	491.622	506.235	1094.97	967.182	498.929	1031.08	2.06658	2.06658	0	0
10401831	NM_001013824	EG435337	12.059	11.4419	31.7969	16.5874	11.7505	24.1921	2.05883	2.05883	0.039978	0.131337
10404132	NM_001111110	Cmah	225.587	254.05	473.235	513.689	239.818	493.462	2.05765	2.05765	0	0
10557862	NM_001082960	Itgam	545.402	636.367	1204.54	1227.07	590.885	1215.81	2.05761	2.05761	0	0
10583056	NM_008605	Mmp12	972.136	1038.7	2050.4	2069.78	1005.42	2060.09	2.04899	2.04899	0	0
10474488	NM_001005568	Olfr1281	1.0761	21.4706	21.7814	24.1974	11.2734	22.9894	2.03927	2.03927	0.296439	0.539997
10570432	AF357390	Rpl27a	1408.75	1440.2	1887.05	3847.02	1424.47	2867.03	2.0127	2.0127	0.0736288	0.209084
10461828	NM_146990	Olfr1494	28.0977	37.2074	51.8167	78.9371	32.6525	65.3769	2.0022	2.0022	0.00701941	0.031394
10519857	NM_010427	Hgf	780.837	821.153	391.611	408.685	800.995	400.148	0.499564	-2.00175	0	0
10362418	NM_029726	Trdn	18.6187	11.712	6.7806	8.21148	15.1654	7.49604	0.494287	-2.02312	0.00648937	0.0294156
10409833	NM_008086	Gas1	5909.35	6136.08	3057.14	2864.02	6022.71	2960.58	0.491569	-2.0343	0	0
10536658	NM_053116	Wnt16	699.46	649.745	359.158	303.044	674.602	331.101	0.49081	-2.03745	1.17684e-14	2.24966e-13
10548899	NM_181988	Rerg	821.776	748.321	381.008	388.091	785.049	384.55	0.489842	-2.04148	0	0
10496125	NM_020265	Dkk2	2173.68	2169.54	1080.23	1047.23	2171.61	1063.73	0.489836	-2.0415	0	0
10473521	NM_001011734 // NM_001011734	Olfr1116 // Olfr1116	24.1938	13.1154	9.637	8.43808	18.6546	9.03754	0.484466	-2.06413	0.0297786	0.103808
10545372	NM_153778	Atoh8	669.542	670.247	333.705	315.075	669.894	324.39	0.484241	-2.06509	0	0
10540298	NM_007697	Chl1	346.698	352.289	189.422	148.61	349.493	169.016	0.483602	-2.06782	1.58862e-09	2.09358e-08
10405587	NM_009369	Tgfbi	5161.96	4932.27	2493.04	2360.93	5047.11	2426.99	0.480866	-2.07958	0	0
10440258	NM_010140	Epha3	1278.71	1343.54	625.564	621.673	1311.12	623.619	0.475637	-2.10244	0	0
10439009	NM_007470	Apod	1389.71	1662.22	729.631	718.35	1525.97	723.99	0.474447	-2.10772	2.22045e-16	4.60083e-15
10587616	NM_178738	Prss35	346.81	371.423	168.113	169.28	359.116	168.697	0.469755	-2.12877	0	0
10348451	NM_007722	Cxcr7	848.349	917.853	432.438	393.008	883.101	412.723	0.467357	-2.13969	0	0
10413012	AK034234	Fut11	249.44	91.2059	55.1649	103.745	170.323	79.4549	0.466496	-2.14364	0.245335	0.479423
10487890	BC099428	Erv3	299.169	311.68	150.304	133.626	305.424	141.965	0.464812	-2.15141	0	0
10607124	NM_001114385	Chrdl1	495.288	486.239	241.299	214.34	490.764	227.819	0.464214	-2.15418	0	0
10382321	NM_008425	Kcnj2	313.921	318.779	141.6	150.119	316.35	145.859	0.461069	-2.16887	0	0
10357870	NM_054077	Prelp	373.908	333.218	162.958	160.176	353.563	161.567	0.456967	-2.18834	0	0
10538802	NM_172399	A930038C07Rik	1679.92	1813.93	786.936	804.477	1746.92	795.707	0.45549	-2.19544	0	0
10498383	ENSMUST00000097075	Igsf10	3695.84	4004.49	1724.1	1768.92	3850.16	1746.51	0.45362	-2.20449	0	0
10450038	NM_020581	Angptl4	3711.44	3384.79	1849.01	1351.21	3548.11	1600.11	0.450975	-2.21742	7.79366e-07	7.66348e-06
10536611	NM_019697	Kcnd2	401.751	432.927	170.359	205.155	417.339	187.757	0.44989	-2.22277	1.11022e-15	2.24036e-14
10486875	NM_172673	Frmd5	550.312	557.985	249.351	247.803	554.149	248.577	0.448574	-2.22929	0	0
10597817	NM_031161	Cck	1638.34	1438.37	611.825	754.422	1538.35	683.124	0.444062	-2.25194	3.85096e-11	5.76769e-10
10566543	ENSMUST00000078482	Dchs1	727.931	707.043	308.506	326.972	717.487	317.739	0.44285	-2.2581	0	0
10502805	NM_008966	Ptgfr	405.98	428.937	202.6	167.094	417.459	184.847	0.442792	-2.2584	2.22045e-16	4.60083e-15
10358389	NM_009061	Rgs2	1087.13	1176.59	479.942	516.265	1131.86	498.103	0.440076	-2.27233	0	0
10468722	NM_010279	Gfra1	3918.31	4030.26	1768.49	1728.28	3974.29	1748.39	0.439925	-2.27312	0	0
10362495	NM_009925	Col10a1	898.386	907.646	384.38	406.421	903.016	395.401	0.437867	-2.2838	0	0
10368317	NM_134005	Enpp3	1307.09	1296.8	539.047	598.126	1301.95	568.587	0.436721	-2.28979	0	0
10395409	NM_008584	Meox2	377.616	439.2	171.269	184.9	408.408	178.085	0.436046	-2.29334	0	0
10522503	NM_011058	Pdgfra	3590.02	3451.86	1589.23	1469.67	3520.94	1529.45	0.434387	-2.30209	0	0
10602896	NM_178712	Gpr64	993.991	1092.6	444.355	458.507	1043.29	451.431	0.432698	-2.31108	0	0
10575693	NM_173016	Vat1l	381.149	377.802	172.67	154.216	379.475	163.443	0.430708	-2.32176	0	0
10428388	NM_172815	Rspo2	1427.67	1550.44	620.714	660.95	1489.06	640.832	0.43036	-2.32363	0	0
10369752	NM_178678	Lrrtm3	769.241	840.501	320.89	367.45	804.871	344.17	0.427609	-2.33859	0	0
10426767	NM_009701	Aqp5	423.306	417.785	170.058	186.26	420.545	178.159	0.423637	-2.36051	0	0
10498386	ENSMUST00000097075	Igsf10	2976.2	3240.76	1287.06	1321.12	3108.48	1304.09	0.419527	-2.38364	0	0
10423049	BC096586	Prlr	130.788	111.902	53.2461	45.5718	121.345	49.4089	0.407177	-2.45594	4.44089e-16	9.09041e-15
10566272	NM_008221	Hbb-y	32.0366	20.6653	10.4978	10.7614	26.3509	10.6296	0.403387	-2.47901	5.65833e-05	0.000417922
10408557	NM_025429	Serpinb1a	264.474	288.015	98.2666	123.919	276.245	111.093	0.402155	-2.4866	1.17906e-13	2.12051e-12
10353252	NM_001033288	Gm106	233.726	219.033	86.9255	93.2912	226.379	90.1083	0.398041	-2.5123	0	0
10458828	NM_033037	Cdo1	2089.16	2247.75	826.067	896.501	2168.45	861.284	0.397189	-2.5177	0	0
10459866	NM_028122	Slc14a1	943.093	968.311	368.297	365.849	955.702	367.073	0.384087	-2.60358	0	0
10359307	NM_177839	Tnn	1096.16	1118.9	404.264	425.207	1107.53	414.736	0.37447	-2.67044	0	0
10518526	NM_001039554	Angptl7	674.364	642.267	231.311	244.303	658.315	237.807	0.361236	-2.76827	0	0
10455721	NM_026408	Sncaip	1154.97	1133.06	373.013	443.548	1144.01	408.28	0.356885	-2.80202	0	0
10487987	NM_177303	Lrrn4	444.326	443.207	156.469	159.525	443.767	157.997	0.356036	-2.80871	0	0
10607848	NM_019397	Egfl6	462.166	469.654	155.783	175.272	465.91	165.528	0.355279	-2.81469	0	0
10424119	NM_010930	Nov	2515.6	2415.46	911.564	820.929	2465.53	866.247	0.351343	-2.84622	0	0
10436304	NM_001014423	Abi3bp	1088.33	1193.55	402.505	398.915	1140.94	400.71	0.351211	-2.84729	0	0
10422164	NM_007904	Ednrb	1493.27	1476.4	493.931	514.129	1484.83	504.03	0.339452	-2.94592	0	0
10373638	NM_146553	Olfr806	1.73069	1.97537	1.24909	0.00630526	1.85303	0.627698	0.338741	-2.95211	0.250984	0.48693
10492355	NM_008604	Mme	1124.89	1251.76	385.011	415.989	1188.32	400.5	0.337029	-2.9671	0	0
10526441	NM_175309	Upk3b	978.304	924.072	322.615	274.468	951.188	298.542	0.313862	-3.18612	0	0
10365983	NM_008524	Lum	2533.35	2765.94	782.433	872.857	2649.64	827.645	0.312361	-3.20142	0	0
10441093	NM_133659	Erg	1058.39	897.471	287.294	282.002	977.932	284.648	0.291072	-3.43558	0	0
10570957	NM_013834	Sfrp1	4209.51	4610.86	1269.83	1103.95	4410.19	1186.89	0.269125	-3.71574	0	0
10511363	NM_001002927	Penk	4672.77	4688.16	1236.2	1173.4	4680.47	1204.8	0.257411	-3.88484	0	0
10599001	NM_007429	Agtr2	1468.54	1581.24	340.058	375.72	1524.89	357.889	0.234698	-4.2608	0	0
10598085	ENSMUST00000119235	ATP6	5640.78	610.309	639.014	701.926	3125.55	670.47	0.214513	-4.66173	0.359865	0.606357
10439500	NM_178924	Upk1b	1241.1	1223.74	279.642	239.085	1232.42	259.364	0.210451	-4.75171	0	0
10372503	NM_010195	Lgr5	1275.46	1344.94	236.569	249.141	1310.2	242.855	0.185357	-5.39499	0	0

## Sheet: With 4F
Probe Set ID	Gene Accession	Gene Symbol	4F-siControl-1	4F-siControl-2	4F-siWISP1_1	4F-siWISP1_2	AVG siCtrl	AVG siWisp1	siWisp1/siCtrl	Fold Change (siWisp1/Ctrl)	Raw p-value	Adjusted p-value (Benjamini & Hochberg)
10582592	NM_009606	Acta1	1216.86	1301.55	9011.8	9352.93	1259.21	9182.36	7.29219	7.29219	0	0
10375137	NM_031169	Kcnmb1	108.041	107.483	660.932	658.807	107.762	659.869	6.1234	6.1234	0	0
10446965	NM_207246	Rasgrp3	367.802	401.427	2246.95	2302.73	384.615	2274.84	5.91459	5.91459	0	0
10487588	NM_010554	Il1a	44.1011	76.4052	287.035	365.989	60.2532	326.512	5.419	5.419	1.03877e-08	1.29232e-07
10541605	NM_020001	Clec4n	57.2764	76.7799	357.475	330.107	67.0281	343.791	5.12905	5.12905	0	0
10499932	NM_026335	Lce1h	785.497	828.049	3694.99	3584.32	806.773	3639.66	4.51138	4.51138	0	0
10565786	NM_177448	Mogat2	79.5787	109.527	435.428	394.778	94.5526	415.103	4.39018	4.39018	0	0
10437885	NM_013607	Myh11	162.408	188.183	759.361	752.266	175.296	755.813	4.31165	4.31165	0	0
10404301	NM_025896	Prl3a1	101.754	114.438	442.837	465.134	108.096	453.986	4.19983	4.19983	0	0
10516765	NM_172702	Serinc2	307.905	379.009	1205.53	1225.06	343.457	1215.29	3.53842	3.53842	0	0
10350123	NM_053106	Lmod1	195.549	189.976	651.825	711.073	192.763	681.449	3.53517	3.53517	0	0
10347888	NM_016960	Ccl20	157.522	182.935	570.762	588.325	170.229	579.543	3.4045	3.4045	0	0
10362416	NM_029726	Trdn	0.459159	2.14443	6.16148	2.52005	1.3018	4.34077	3.33444	3.33444	0.121636	0.327465
10480003	NM_010582	Itih2	79.4276	89.8182	271.519	291.224	84.6229	281.371	3.325	3.325	0	0
10409170	NM_015759	Fgd3	183.581	179.679	587.295	620.248	181.63	603.772	3.32419	3.32419	0	0
10522324	NM_008069	Gabrb1	224.778	239.753	728.059	802.396	232.266	765.228	3.29463	3.29463	0	0
10404132	NM_001111110	Cmah	89.5298	110.135	320.518	328.204	99.8321	324.361	3.24906	3.24906	0	0
10451646	NM_178796	A530064D06Rik	75.5145	62.5028	184.28	263.261	69.0087	223.77	3.24264	3.24264	7.85914e-09	9.9092e-08
10523128	NM_023785	Ppbp	1188.37	1481.68	4066.16	4528.32	1335.02	4297.24	3.21885	3.21885	0	0
10389222	NM_009139	Ccl6	937.49	1009.11	2833.61	3309.99	973.3	3071.8	3.15607	3.15607	0	0
10467191	NM_013468	Ankrd1	1363.87	1328.01	4104.79	4341.59	1345.94	4223.19	3.13773	3.13773	0	0
10372410	NM_028608	Glipr1	1273.93	1357.27	3923.41	4004.61	1315.6	3964.01	3.01308	3.01308	0	0
10544273	NM_001038604	Clec5a	45.88	55.5548	151.355	151.837	50.7174	151.596	2.98904	2.98904	0	0
10507152	NM_172306	Cyp4a12b	139.619	178.796	491.711	453.895	159.207	472.803	2.96974	2.96974	0	0
10493889	NM_028622	Lce1c	255.844	227.097	661.46	770.681	241.47	716.07	2.96546	2.96546	0	0
10601648	NM_022322	Tnmd	84.5616	95.2986	232.893	298.902	89.9301	265.898	2.95671	2.95671	6.43929e-15	1.25593e-13
10543239	NM_031198	Tcfec	237.841	284.735	784.394	759.276	261.288	771.835	2.95396	2.95396	0	0
10542247	NM_207021	Tas2r117	5.06105	13.1599	41.1477	11.5418	9.11049	26.3448	2.8917	2.8917	0.216747	0.483812
10494817	NM_013609	Ngf	772.216	981.558	2525.29	2303.62	876.887	2414.45	2.75344	2.75344	2.22045e-15	4.42794e-14
10567580	NM_030691	Igsf6	293.012	292.731	770.801	723.206	292.872	747.004	2.55062	2.55062	0	0
10503958	NM_001081095	1700009N14Rik	195.587	164.542	430.247	467.564	180.065	448.905	2.49303	2.49303	0	0
10583809	NM_009922	Cnn1	2021.7	2115.35	5159.7	5128.49	2068.53	5144.09	2.48684	2.48684	0	0
10566993	NM_173739	Galntl4	432.921	543.529	1235.65	1154.3	488.225	1194.97	2.44759	2.44759	3.26406e-14	6.09862e-13
10536667	NM_001081306	Ptprz1	479.262	518.346	1164.5	1251.78	498.804	1208.14	2.42207	2.42207	0	0
10545707	NM_009610	Actg2	2727.89	2639.98	6249.31	6697.94	2683.93	6473.62	2.41199	2.41199	0	0
10550815	NM_030735	V1rd9	2.90672	41.8587	66.5757	41.2519	22.3827	53.9138	2.40873	2.40873	0.25009	0.527384
10527638	NM_009663	Alox5ap	240.459	267.938	603.967	620.454	254.199	612.21	2.40839	2.40839	0	0
10362440	NM_029726	Trdn	6.07342	9.21635	24.2149	12.5482	7.64488	18.3816	2.40443	2.40443	0.0297885	0.112461
10534927	NM_153510	Pilra	79.088	103.531	204.211	231.065	91.3096	217.638	2.38352	2.38352	3.40017e-09	4.44472e-08
10507143	NM_177406	Cyp4a12a	73.2069	113.119	216.748	226.916	93.1631	221.832	2.38111	2.38111	4.66885e-05	0.000364817
10569437	NM_009434	Phlda2	668.322	784.77	1654.27	1798.58	726.546	1726.43	2.37621	2.37621	0	0
10356712	NM_008440	Kif1a	555.64	578.914	1296.53	1384	567.277	1340.27	2.36263	2.36263	0	0
10583056	NM_008605	Mmp12	836.361	889.135	2006.69	2047.95	862.748	2027.32	2.34984	2.34984	0	0
10375443	NM_134250	Havcr2	391.491	381.749	870.413	938.225	386.62	904.319	2.33904	2.33904	0	0
10552380	NM_172900	Siglecg	399.57	442.894	1003.62	964.385	421.232	984.004	2.33601	2.33601	0	0
10355109	NM_146250	Gpr1	113.034	107.306	260.689	249.847	110.17	255.268	2.31704	2.31704	0	0
10559467	NM_011089	Pira2	123.322	149.035	306.37	319.532	136.178	312.951	2.2981	2.2981	0	0
10572897	NM_010442	Hmox1	2134.39	2454.83	5290.04	5254.46	2294.61	5272.25	2.29767	2.29767	0	0
10351509	NM_144559	Fcgr4	252.491	226.192	510.733	588.847	239.341	549.79	2.2971	2.2971	0	0
10355813	NM_008985	Ptprn	533.286	623.588	1394.19	1253.92	578.437	1324.05	2.28902	2.28902	0	0
10402353	NM_145449	Ifi27l2b	849.685	922.201	1942.03	2098.66	885.943	2020.34	2.28044	2.28044	0	0
10498441	NM_177346	Gpr149	591.391	617.806	1372.85	1344.72	604.599	1358.79	2.24742	2.24742	0	0
10497501	XM_910834	Naaladl2	4.91416	7.19287	18.276	8.79491	6.05352	13.5355	2.23597	2.23597	0.0662815	0.209914
10559478	NM_011090	Pira3	82.4283	63.4274	180.079	145.765	72.9279	162.922	2.23402	2.23402	1.64585e-06	1.59281e-05
10571399	NM_178395	Zdhhc2	948.04	1029.59	2161.65	2244.25	988.817	2202.95	2.22787	2.22787	0	0
10354374	NM_016917	Slc40a1	160.309	165.598	339.055	380.639	162.953	359.847	2.20828	2.20828	0	0
10531261	NM_028478	Rassf6	170.155	162.134	328.86	401.083	166.144	364.971	2.19671	2.19671	1.88738e-14	3.5829e-13
10454514	NM_144862	Lims2	492.738	473.23	1104.62	980.595	482.984	1042.61	2.15868	2.15868	0	0
10492004	XR_001873	EG666444	183.953	218.782	276.68	588.892	201.367	432.786	2.14923	2.14923	0.0711913	0.221506
10347335	NM_013612	Slc11a1	286.012	310.545	652.381	627.412	298.279	639.896	2.1453	2.1453	0	0
10497265	NM_024406	Fabp4	155.923	152.803	322.479	338.955	154.363	330.717	2.14247	2.14247	0	0
10527332	NM_016789	Nptx2	174.314	202.045	402.892	399.751	188.179	401.321	2.13265	2.13265	0	0
10477920	NM_172118	Myl9	4670.2	4438.17	9339.96	10060.1	4554.19	9700.03	2.12991	2.12991	0	0
10436727	NM_144854	ORF63	201.582	229.39	456.278	461.036	215.486	458.657	2.12848	2.12848	0	0
10427628	NM_008372	Il7r	246.728	283.235	565.794	557.683	264.982	561.739	2.11992	2.11992	0	0
10572635	NM_018754	Sfn	354.572	355.707	733.082	770.788	355.14	751.935	2.11729	2.11729	0	0
10362456	NM_029726	Trdn	3.62064	4.36979	13.4538	3.31354	3.99521	8.38368	2.09843	2.09843	0.463734	0.735208
10554752	NM_015760	Nox4	393.971	404.048	812.643	856.574	399.01	834.609	2.0917	2.0917	0	0
10593123	NM_011526	Tagln	3477.71	3627.23	7558.74	7287.16	3552.47	7422.95	2.08952	2.08952	0	0
10512279	NM_016673	Cntfr	240.371	257.858	491.208	533.375	249.114	512.292	2.05645	2.05645	0	0
10539517	NM_021469	Dysf	290.37	324.969	628.378	634.697	307.669	631.538	2.05265	2.05265	0	0
10541614	NM_010819	Clec4d	391.467	442.127	850.304	859.349	416.797	854.826	2.05094	2.05094	0	0
10382802	NM_011451	Sphk1	287.524	294.705	593.981	594.188	291.114	594.085	2.04073	2.04073	0	0
10474096	NM_178725	Lrrc4c	243.659	226.04	418.904	535.766	234.85	477.335	2.03251	2.03251	4.73332e-08	5.45006e-07
10492964	NM_009690	Cd5l	58.1996	91.877	150.008	154.829	75.0383	152.418	2.0312	2.0312	0.00133178	0.00775384
10601421	NM_175442	A630033H20Rik	132.983	173.691	256.894	360.418	153.337	308.656	2.01293	2.01293	0.00128382	0.00749919
10357239	NM_019432	Tmem37	270.547	337.271	583.879	636.88	303.909	610.379	2.00843	2.00843	3.04081e-09	3.99701e-08
10375578	NM_008029	Flt4	325.082	411.063	775.692	697.172	368.072	736.432	2.00078	2.00078	5.86919e-08	6.70366e-07
10607712	NM_008177	Grpr	659.506	750.927	351.206	350.712	705.216	350.959	0.497661	-2.0094	0	0
10353252	NM_001033288	Gm106	985.031	968.373	454.314	516.413	976.702	485.363	0.496941	-2.01231	0	0
10501924	NM_031186	Ndst3	802.071	803.583	407.36	386.019	802.827	396.689	0.494116	-2.02382	0	0
10367481	NM_207559	Olfr776	60.9725	59.9529	32.2153	27.5165	60.4627	29.8659	0.493956	-2.02447	0	0
10548899	NM_181988	Rerg	589.812	654.181	303.295	309.935	621.997	306.615	0.492953	-2.02859	0	0
10436304	NM_001014423	Abi3bp	347.397	327.372	165.305	167.278	337.384	166.291	0.492884	-2.02888	0	0
10545862	NM_001037842	Cml3	360.964	462.884	200.919	203.307	411.924	202.113	0.490655	-2.03809	1.53439e-08	1.87351e-07
10496125	NM_020265	Dkk2	1462.8	1593.32	753.113	731.907	1528.06	742.51	0.485918	-2.05796	0	0
10454601	NM_021367	Tslp	321.728	307.969	131.664	171.558	314.849	151.611	0.481537	-2.07668	3.55258e-08	4.16883e-07
10538802	NM_172399	A930038C07Rik	704.361	736.679	329.178	364.16	720.52	346.669	0.481137	-2.07841	0	0
10348999	NM_011800	Cdh20	751.099	780.168	379.076	354.911	765.633	366.994	0.479333	-2.08623	0	0
10571840	NM_008278	Hpgd	380.703	430.36	197.933	188.966	405.531	193.45	0.477027	-2.09632	0	0
10405872	AY149175	Zfp640	10.8985	15.2229	6.93172	5.4993	13.0607	6.21551	0.475895	-2.1013	0.00029722	0.00200227
10522503	NM_011058	Pdgfra	1077.54	948.315	451.026	501.147	1012.93	476.087	0.470012	-2.12761	0	0
10346410	NM_023617	Aox3	193.757	224.517	108.991	86.2664	209.137	97.6288	0.466817	-2.14217	2.98072e-08	3.51984e-07
10597817	NM_031161	Cck	1322.36	1540.77	651.82	669.212	1431.56	660.516	0.461396	-2.16734	0	0
10424119	NM_010930	Nov	1597.1	1593.91	699.583	760.394	1595.51	729.988	0.457528	-2.18566	0	0
10570957	NM_013834	Sfrp1	4109.75	3696.8	1777.18	1784.4	3903.27	1780.79	0.45623	-2.19188	0	0
10351463	ENSMUST00000027997	Rgs5	403.158	477.494	207.829	189.409	440.326	198.619	0.451072	-2.21694	2.22045e-16	4.67992e-15
10427685	NM_177123	Spef2	7.33748	8.5798	3.94514	3.10203	7.95864	3.52358	0.442737	-2.25868	1.12807e-08	1.39609e-07
10351455	NM_009063	Rgs5	1303.02	1288.59	559.222	587.619	1295.8	573.42	0.442521	-2.25978	0	0
10492798	NM_009144	Sfrp2	787.266	786.012	373.305	314.103	786.639	343.704	0.436927	-2.28871	0	0
10469066	NM_028804	Ccdc3	1527.01	1415.33	589.1	684.286	1471.17	636.693	0.432781	-2.31064	0	0
10351293	NM_019759	Dpt	314.561	323.082	147.197	119.883	318.822	133.54	0.418856	-2.38745	0	0
10442069	NM_025681	Lix1	607.152	544.892	236.019	237.672	576.022	236.845	0.411174	-2.43206	0	0
10600886	NM_029536	Gpr165	516.541	491.985	220.019	189.5	504.263	204.76	0.406057	-2.46271	0	0
10511665	NM_178617	Necab1	617.165	713.191	272.833	237.538	665.178	255.185	0.383635	-2.60664	0	0
10395389	NM_025312	Sostdc1	2201.79	2245.14	784.154	882.45	2223.47	833.302	0.374776	-2.66826	0	0
10372503	NM_010195	Lgr5	1231.05	1166.01	418.545	475.055	1198.53	446.8	0.37279	-2.68247	0	0
10461856	NM_008137	Gna14	1929.33	2070.18	724.08	754.278	1999.76	739.179	0.369634	-2.70538	0	0
10355500	NM_010518	Igfbp5	333.376	336.035	142.41	104.353	334.706	123.382	0.368627	-2.71277	8.32392e-11	1.23835e-09
10498383	ENSMUST00000097075	Igsf10	1733.69	1715.48	604.397	646.111	1724.58	625.254	0.362554	-2.75821	0	0
10462542	NM_026334	Lipf	226.441	245.046	78.0965	87.2251	235.744	82.6608	0.350639	-2.85194	0	0
10362495	NM_009925	Col10a1	476.343	518.106	165.41	177.054	497.224	171.232	0.344376	-2.9038	0	0
10536363	NM_009311	Tac1	1720.16	1921.35	553.281	675.879	1820.76	614.58	0.337541	-2.9626	0	0
10498386	ENSMUST00000097075	Igsf10	1366.75	1369.29	460.231	451.674	1368.02	455.952	0.333293	-3.00036	0	0
10599001	NM_007429	Agtr2	387.688	388.792	117.123	135.057	388.24	126.09	0.324773	-3.07907	0	0
10365983	NM_008524	Lum	945.273	908.421	236.267	262.49	926.847	249.378	0.269061	-3.71663	0	0
10535698	NM_177380	Cyp3a44	242.361	1718.52	274.925	207.679	980.441	241.302	0.246116	-4.06313	0.315265	0.603584
10373638	NM_146553	Olfr806	0.00439069	8.64709	1.31312	0.809346	4.32574	1.06123	0.24533	-4.07614	0.661126	0.860172
