# Supplementary material
Source: HighWire-hosted journal article supplement (doi:10.1101/rna.043745.113)
Supplement: SuppLegends.docx [file SuppLegends.docx]

**Supplemental Fig. 1. miR-135b enhances the overall percentage of Oct4-GFP+ cells during reprogramming**

(A) To determine the contribution of Myc to miR-135b induction, RNA was collected 6 days post-transduction in OSKM and OSK infected MEFs and analyzed by RT-qPCR for miR-135b expression. (B) MEFs were transfected with the indicated microRNA mimics 3 hrs before infection with 4F, and cells were trypsinized on day 14 for FACS analysis. Single cells were collected by filtering through a cell strainer. Non-transduced MEFs served as negative controls.

**Supplemental Fig. 2. miR-135b iPSCs show full differentiation capacity**

(A) RT-qPCR analysis of miR-135b levels post-transfection with miR-135b inhibitors or mimics. Error bar represents two independent experiments with duplicate wells. * p<0.05. (B) miR-135b Lineage markers are expressed in differentiated EBs from miR-135b–induced iPSCs. EBs were formed using the hanging drop method for two days and replated onto gelatin-coated plates until day 12-14. Cells were then fixed and stained for AFP (endoderm), tubulin III (ectoderm), and α-actin (mesoderm) expression. DAPI was used for nuclear staining.

**Supplemental Fig. 3. Tgfbr2, Wisp1, and Igfbp5 are directly regulated by miR-135b**

(A) List of predicted miR-135b target sites identified by both miRanda software and Targetscan in Tgfbr2, Wisp1, and Igfbp5 3’UTRs. (B) Dual luciferase assay supported direct regulation by miR-135b. The full length Tgfbr2 3’UTR, a Wisp1 fragment, and the Igfbp5 3’UTR were cloned into pGL3 luciferase reporters and transfected into HeLa cells together with pRL-TK. Relative luciferase activity was calculated by the GL/RL signal and normalized to siControl-transfected cells. p values were calculated using Student’s *t*-test from at least two independent experiments with duplicate wells. (C) miR-93 and 135b both targets Tgfbr2. Dual luciferase assays were performed in Hela cells and microRNAs were transfected at 50nM final concentration. (D) MEFs were transfected with non-targeting siRNA control, miR-135b mimic, miR-135b inhibitor or mutant miR-135b mimic at a final concentration of 50nM for 4 days to verify the direct sequence specificity of the miR-135b and Wisp1 relationship. Total RNAs were extracted for RT-qPCR analysis of Wisp1 mRNA level. Error bar represents experiment with triplicate wells.

**Supplemental Fig. 4. Wisp1 kinetics during iPS induction**

(A) RNA was isolated from MEF during iPS induction on days 1, 3, 5, 7, 9 and 11. RT-qPCR was performed to analyze Wisp1 mRNA over time course. (B) Wisp protein levels in MEFs transduced with 4F over the reprogramming time course were analyzed by immunoblotting. (C) To verify the expression of the HA-tagged Wisp1 construct, immunoblotting was performed to analyze Wisp1 protein and HA expression levels. GAPDH serves as an internal control.

**Supplemental Fig. 5.**

(A) Wisp1 regulates expression of several ECM genes. Wisp1 was knocked down in MEFs by two shRNAs. Expression of representative ECM genes was examined 4 days post-infection. Expression of Tgfbi, Nov, and Dkk2 were strongly decreased upon Wisp1 knockdown, similar to results from siRNAs transfection (Figure 5A). (B) Wisp1 ECM target genes are regulated by miR-135b in MEFs. MEFs were transfected with miR-135b mimic at a final concentration of 50 nM for 4 days. Total RNAs were harvested for RT-qPCR analysis of the indicated Wisp1-regulated ECM genes. Error bar represents experiment with duplicate wells. (C) miR135b indirectly affects Wisp1 regulated ECM genes. Relative MEF mRNA expression of Wisp1, Tgfbi, Igfbp5, Nov and Dkk2 two days after miR-135b hairpin inhibitor transfection. (D) PCR analysis of Wisp1 mRNA after overexpression of Tgfbi, Igfbp5, Nov, Dkk2 and Wisp1 in MEF

**Supplemental Fig. 6. Knockdown of Wisp1 target genes promote reprogramming.**

(A) Dual role of Wisp1 regulated ECM genes. MEF were transfected with siRNAs on days 0 and 5, and GFP+ colonies were counted from day 12-14. (B) Knockdown of Wisp1 target genes enhances iPSC marker expression. Nov, Dkk2, and Tgfbi were knocked down in 4F-transduced MEFs at day 5 post-transduction. Cells from each well were harvested at around day 14 and total RNAs were extracted for RT-qPCR analysis of the representative mES markers, E-Ras, Nanog, and Tet1. Error bars represent data from three independent wells.

**Supplemental Fig. 7. Knockdown of Wisp1 compromises proliferation of normal MEFs**

(A) Wisp1 was efficiently knocked down by five different shRNAs. Five shRNAs targeting mouse Wisp1 were transduced into MEFs. Knockdown efficiency was evaluated at day 4 post-transduction. (B) Consistent knockdown of Wisp1 compromised proliferation of MEFs. MEFs were transduced with shRNAs and then reseeded into 96-well plates. Proliferation of MEFs was measured on days 3 and 6 using Celltiter 96 One Solution assay (Promega, G3582). iPSC induction was evaluated for MEFs transduced with shRNAs targeting Wisp1 on day 0 (C) or day 5 (D). (E) The effect of siRNA mediated knockdown of Wisp1 interacting proteins Nov, Dkk2, Igfbp5, Tgfbi, Bgn and Dcn on MEF proliferation was assessed on day 6 post-transfection by Celltiter 96 One Solution assay.sw

**Supplemental Fig. 8. Role of decorin knockdown and overexpression in iPS induction**

(A) Decorin was knockdown or (B) overexpressed at day 5 and GFP+ colonies were counted on day 12-14 post OSKM transduction.

**Supplemental Table 1. miR-135b target site analysis**

Genes showing significantly repressed expression upon miR-135b transfection were analyzed with miRanda and TargetScan to identify potential miR-135b target sites in their 3’UTR regions. Sites with good seed match and significant predicted energy are listed.

**Supplemental Table 2. Original microRNA expression profile data**

List of microRNAs significantly (2-fold, p<0.05) altered at reprogramming day 5 in Thy1- cells.

**Supplemental Table 3. mRNA expression profile upon miR-135b transfection**

Significantly altered mRNAs upon miR-135b mimic transfection are listed.

**Supplemental Table 4. mRNA microarray data upon Wisp1 knockdown**

Significantly altered mRNAs upon siWisp1 transfection are listed.
