# Supplementary material
Source: HighWire-hosted journal article supplement (doi:10.1101/rna.043745.113)

# Supplemental Figure 1

## A

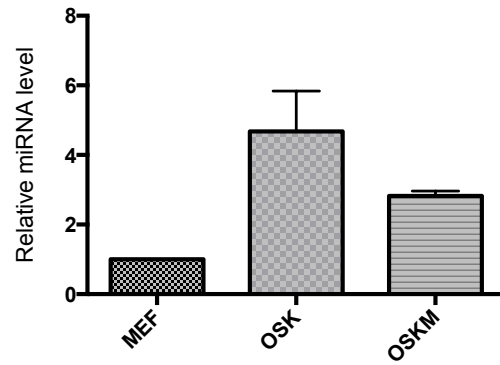

## B

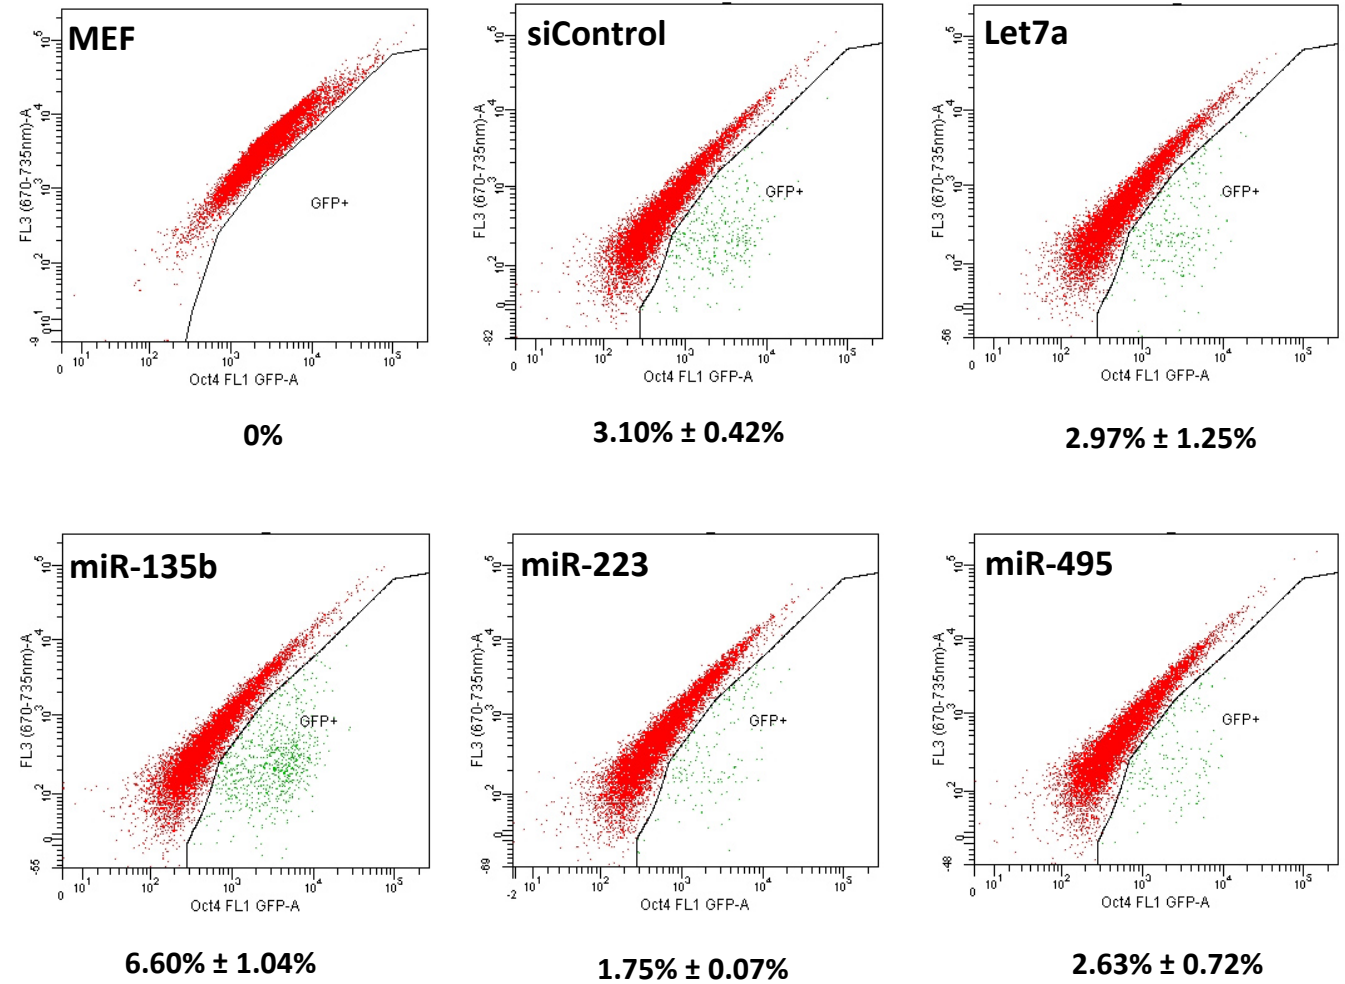

Supplement: miR-135b_Sup_Fig1.pdf [file miR-135b_Sup_Fig1.pdf]

# Supplemental Figure 4

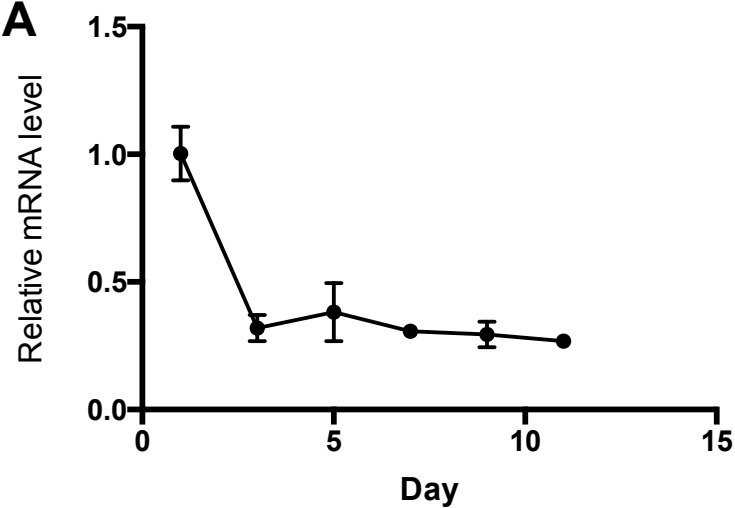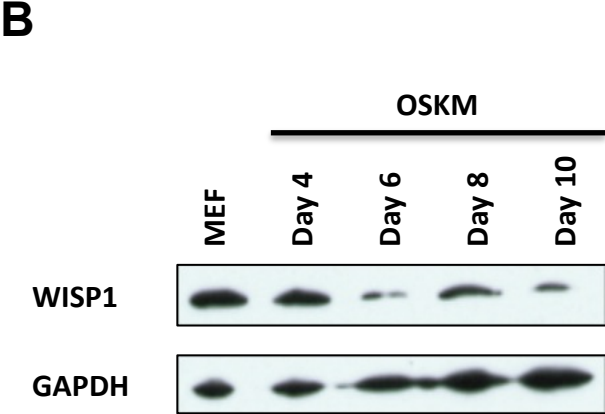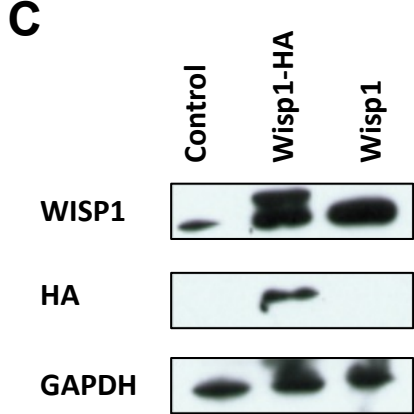

Supplement: miR-135b_Sup_Fig4.pdf [file miR-135b_Sup_Fig4.pdf]

# Supplemental Figure 5

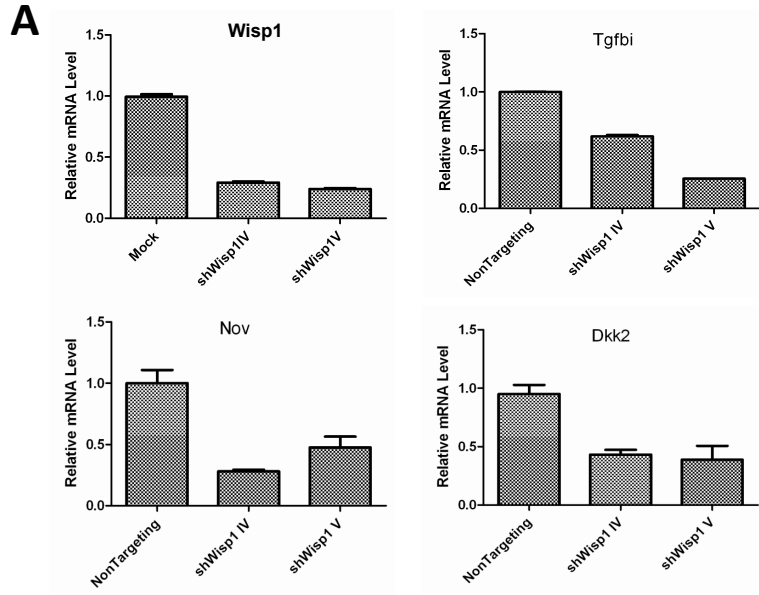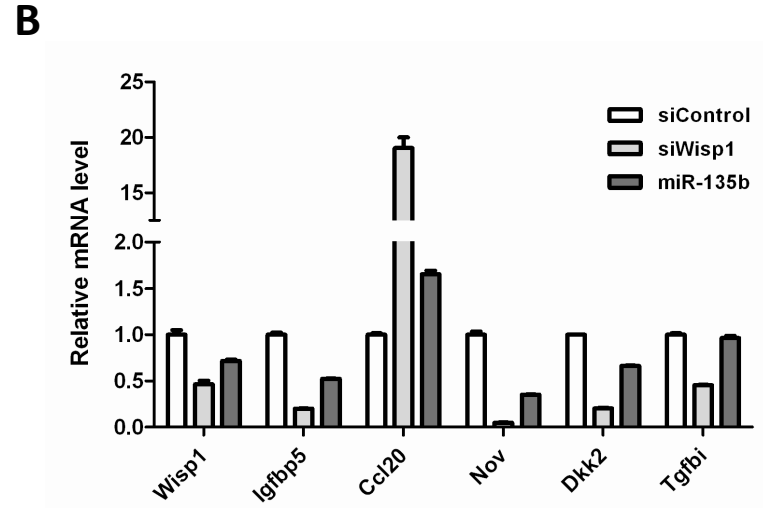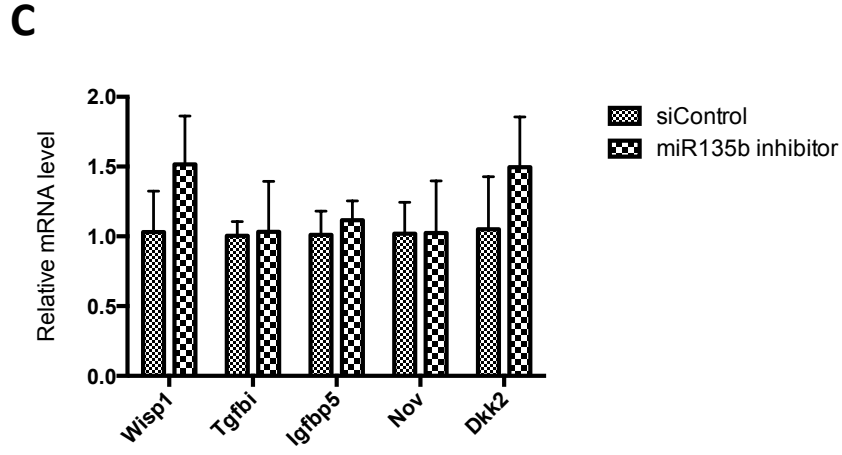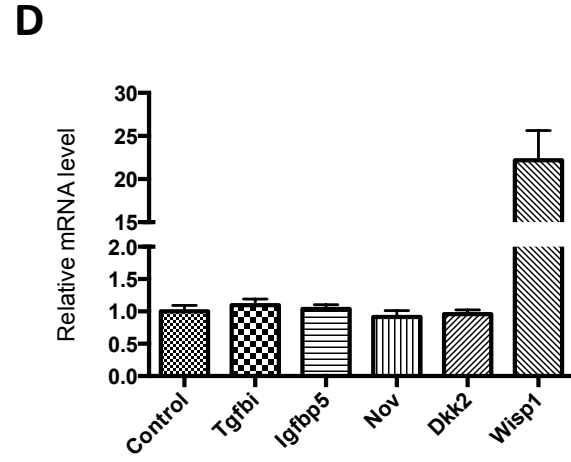

Supplement: miR-135b_Sup_Fig5.pdf [file miR-135b_Sup_Fig5.pdf]

# Supplemental Figure 6

## A

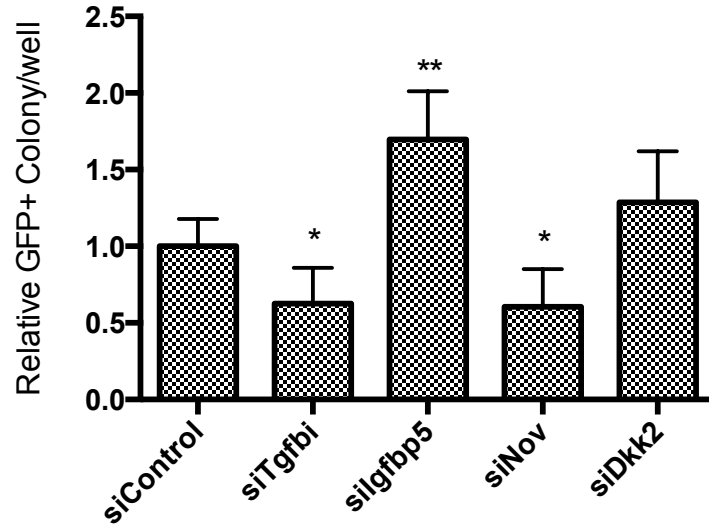

## B

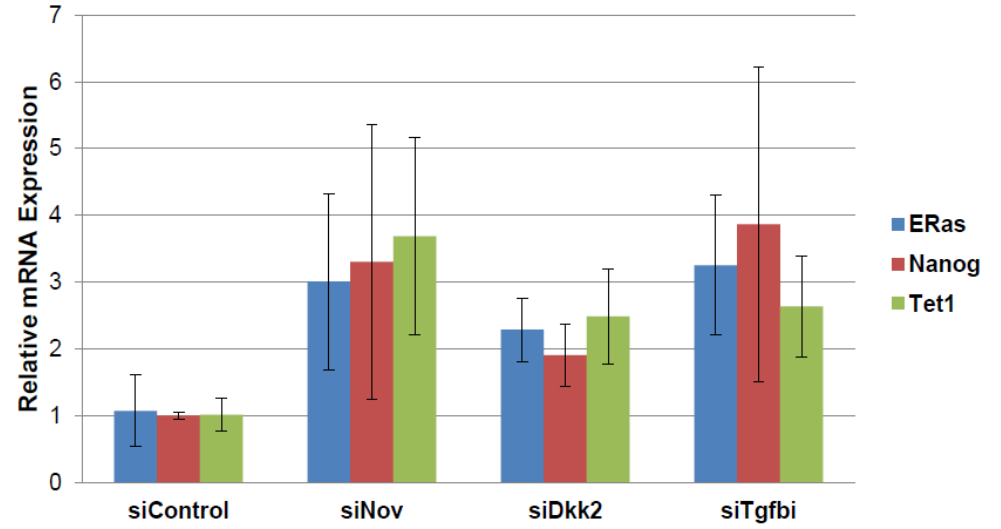

Supplement: miR-135b_Sup_Fig6.pdf [file miR-135b_Sup_Fig6.pdf]

# Supplemental Figure 7

**A**

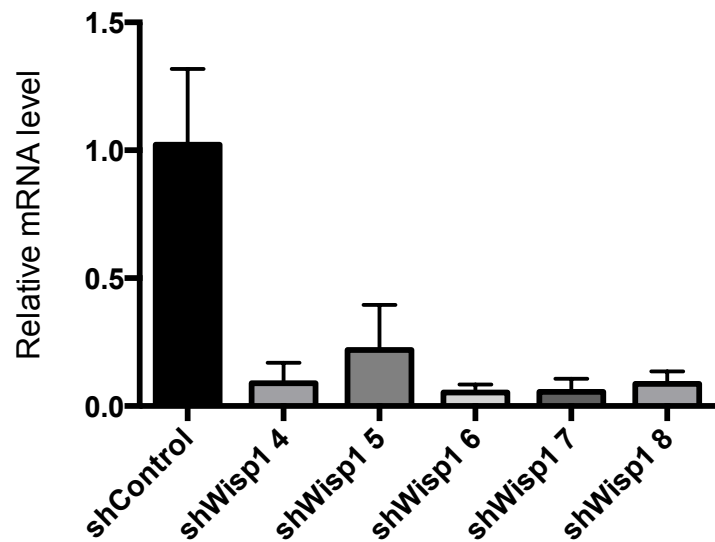

**B**

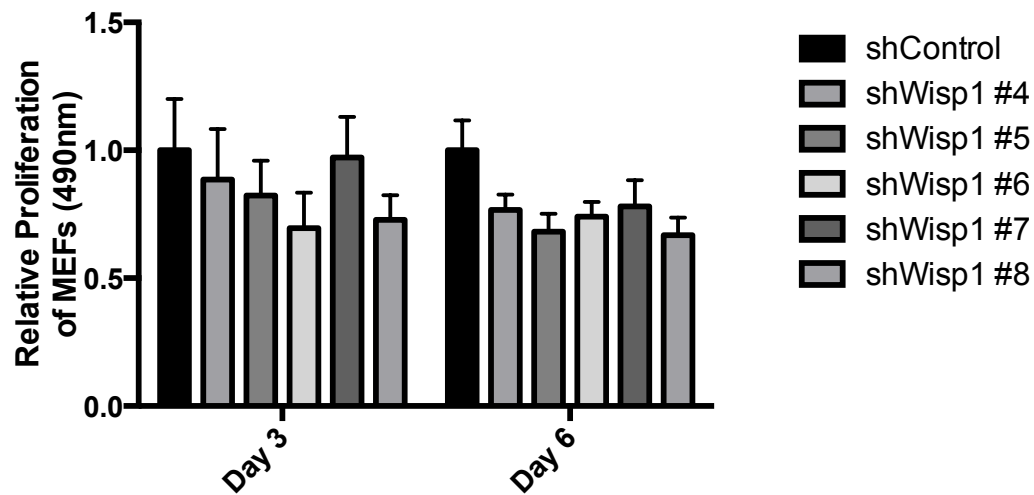

**C**

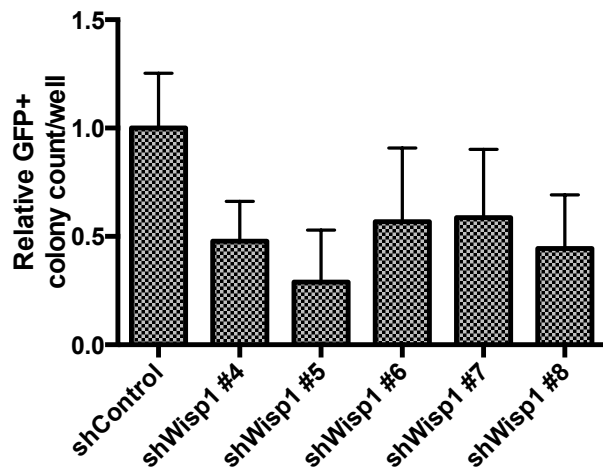

**D**

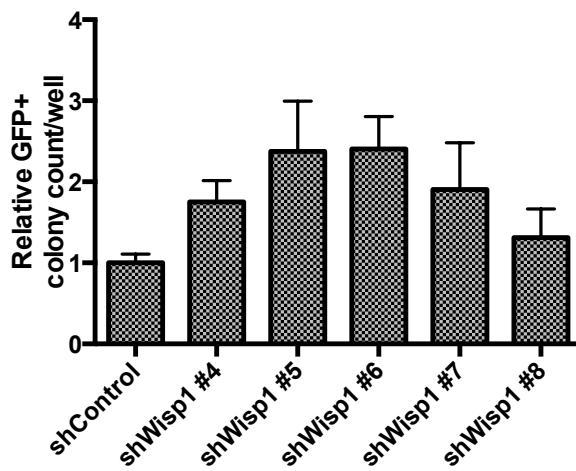

**E**

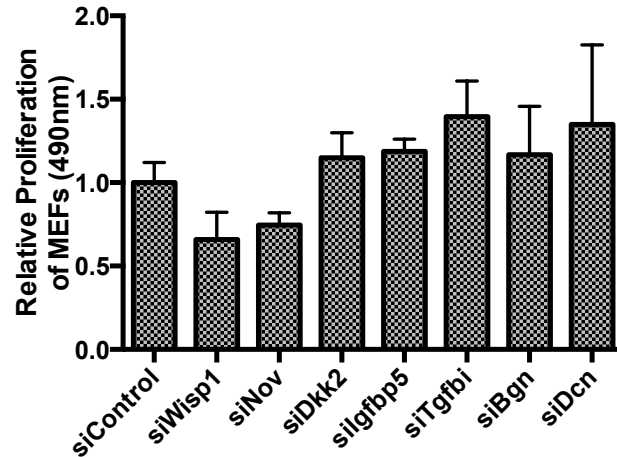

Supplement: miR-135b_Sup_Fig7.pdf [file miR-135b_Sup_Fig7.pdf]

# Supplemental Figure 8

**A**

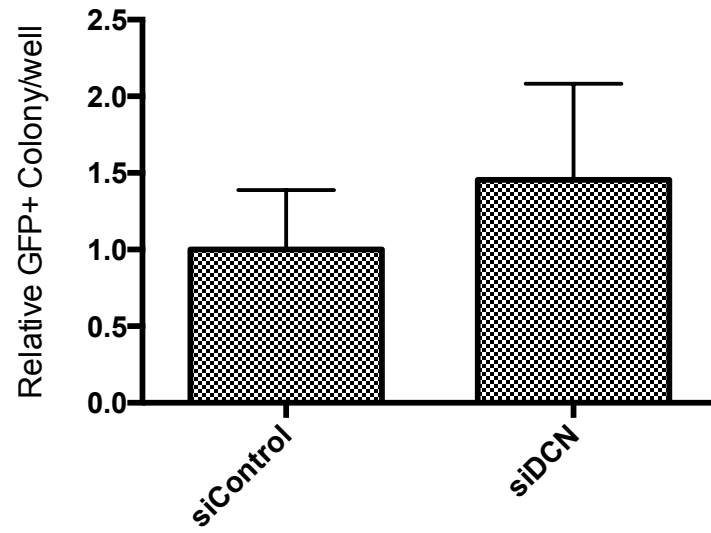

**B**

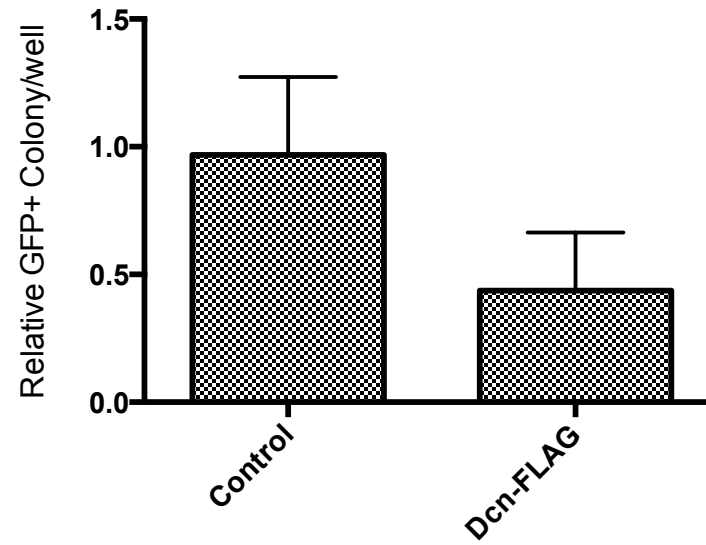

Supplement: miR-135b_Sup_Fig8.pdf [file miR-135b_Sup_Fig8.pdf]
